# Supplementary material for: Synthesis, biological evaluation and mechanism study of a class of benzylideneindanone derivatives as novel anticancer agents
Source: Royal Society of Chemistry journal article supplement (doi:10.1039/c5md00139k), 2015-01-01

## **Supporting Information**

### **Synthesis, Biological Evaluation and Mechanisms Study of a Class of Benzylideneindanone Derivatives as Novel Anticancer Agents**

Jinhui Hu, Jun Yan, Jie Chen, Yanqing Pang, Ling Huang \*, Xingshu Li \*

*Institute of Drug Synthesis and Pharmaceutical Process, School of Pharmaceutical Sciences, Sun  
Yat-sen University, Guangzhou 510006, China*

## HPLC chromatograms of target compounds

### HPLC chromatograms of **5a**

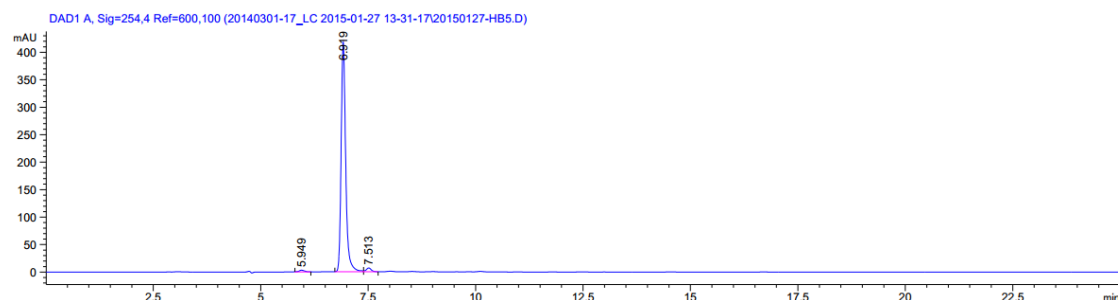

|   | [min] |    | [min]  | [mAU*s]    | [mAU]     | %       |
|---|-------|----|--------|------------|-----------|---------|
| 1 | 5.949 | BB | 0.1308 | 28.18645   | 3.13816   | 0.8898  |
| 2 | 6.919 | BV | 0.1123 | 3083.09839 | 416.69141 | 97.3269 |
| 3 | 7.513 | VB | 0.1211 | 56.48975   | 6.92816   | 1.7833  |

### HPLC chromatograms of **5b**

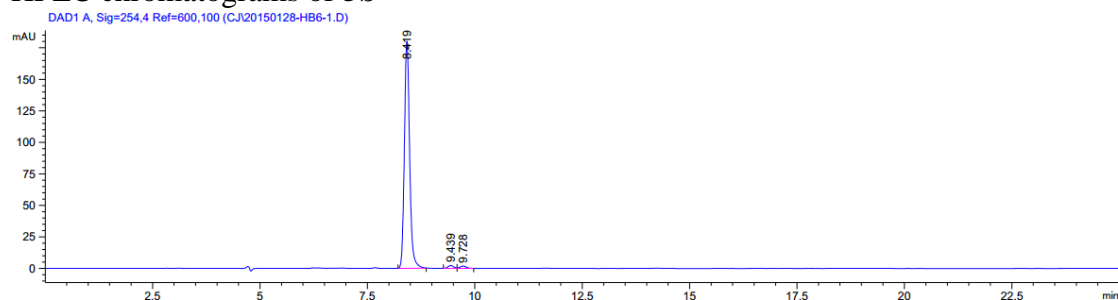

|   | [min] |    | [min]  | [mAU*s]    | [mAU]     | %       |
|---|-------|----|--------|------------|-----------|---------|
| 1 | 8.419 | BB | 0.1313 | 1530.47546 | 179.85263 | 97.5303 |
| 2 | 9.439 | BV | 0.1387 | 20.55617   | 2.29023   | 1.3100  |
| 3 | 9.728 | VB | 0.1478 | 18.19886   | 1.86628   | 1.1597  |

### HPLC chromatograms of **5c**

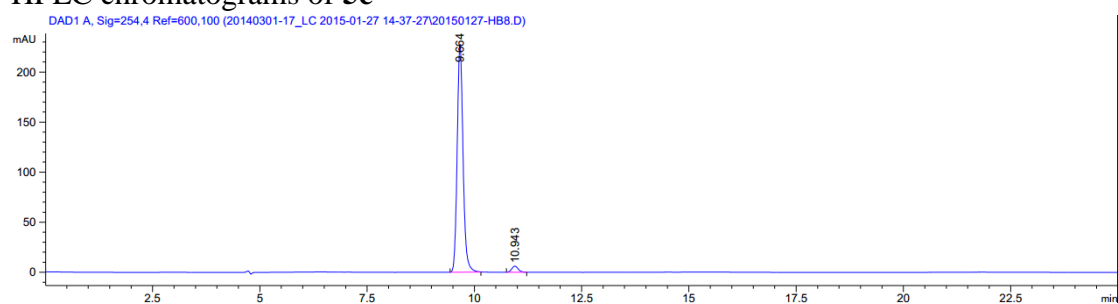

|   | [min]  |    | [min]  | [mAU*s]    | [mAU]     | %       |
|---|--------|----|--------|------------|-----------|---------|
| 1 | 9.664  | BB | 0.1473 | 2167.92749 | 227.31937 | 97.1078 |
| 2 | 10.943 | BB | 0.1622 | 64.56911   | 6.16702   | 2.8922  |

### HPLC chromatograms of **5d**

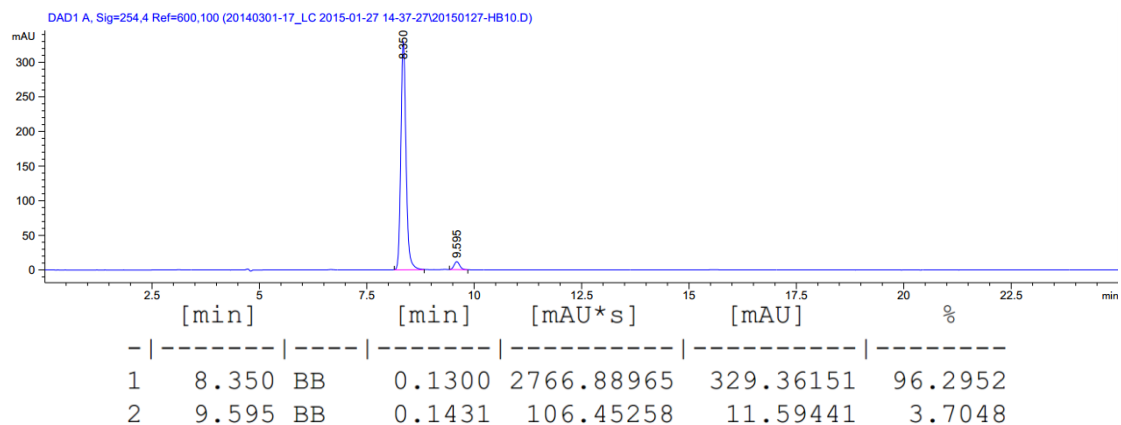

### HPLC chromatograms of **5e**

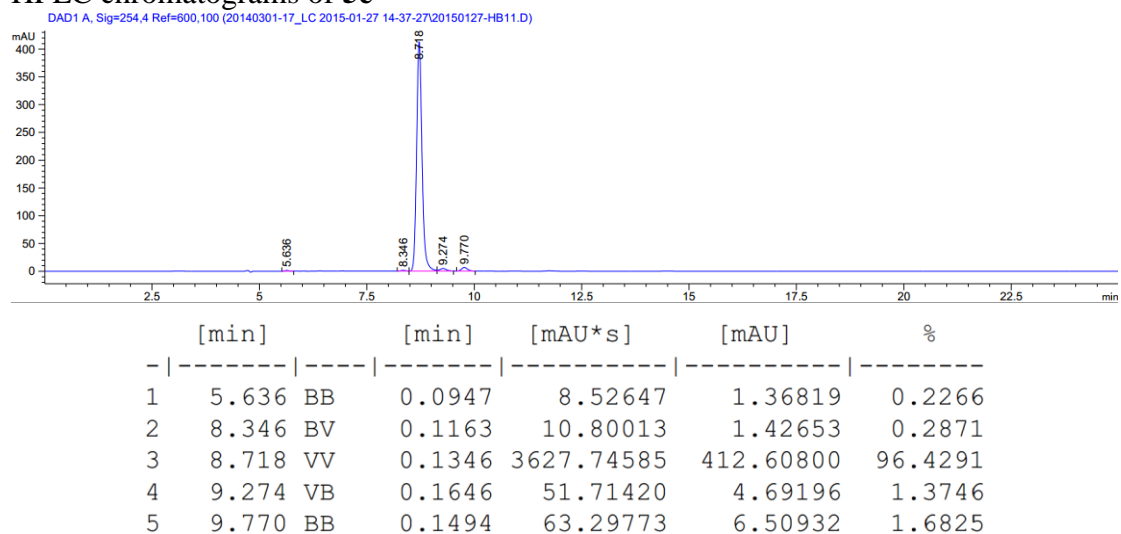

### HPLC chromatograms of **5f**

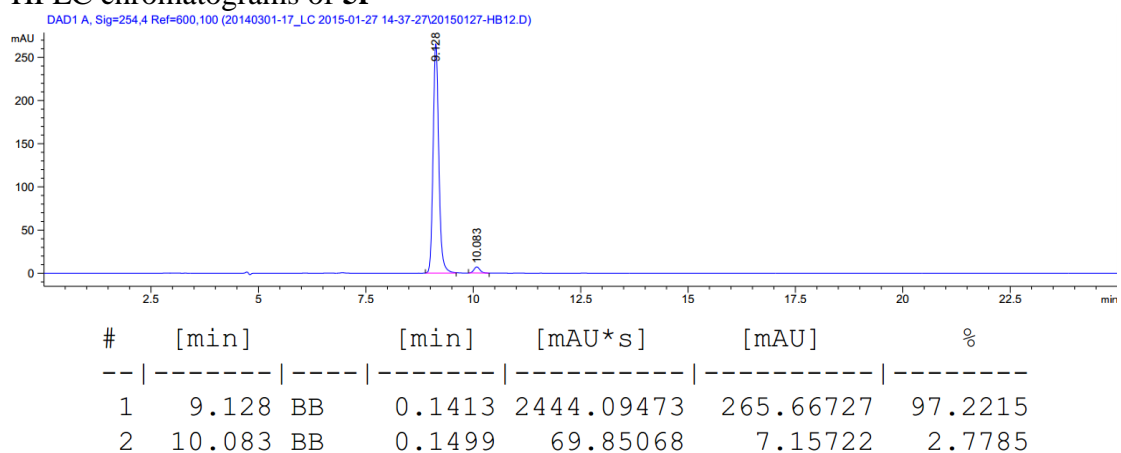

### HPLC chromatograms of **5g**

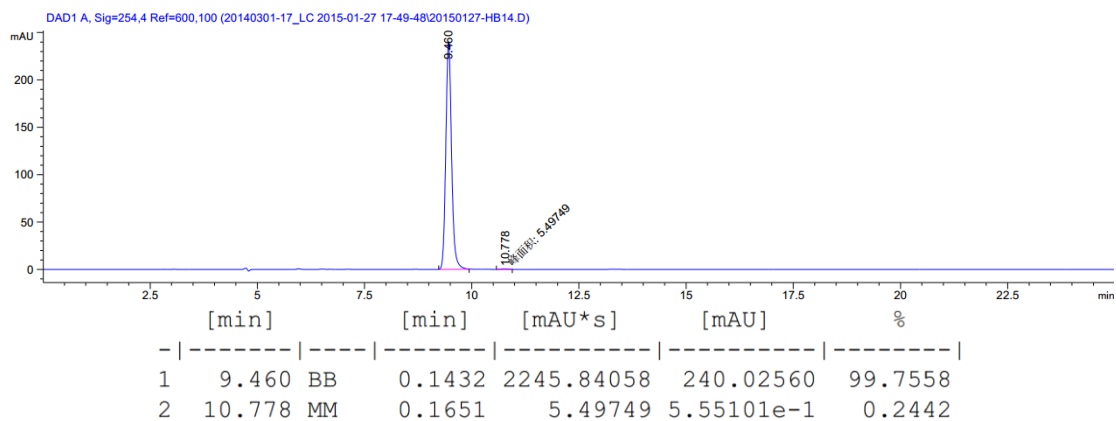

### HPLC chromatograms of 5h

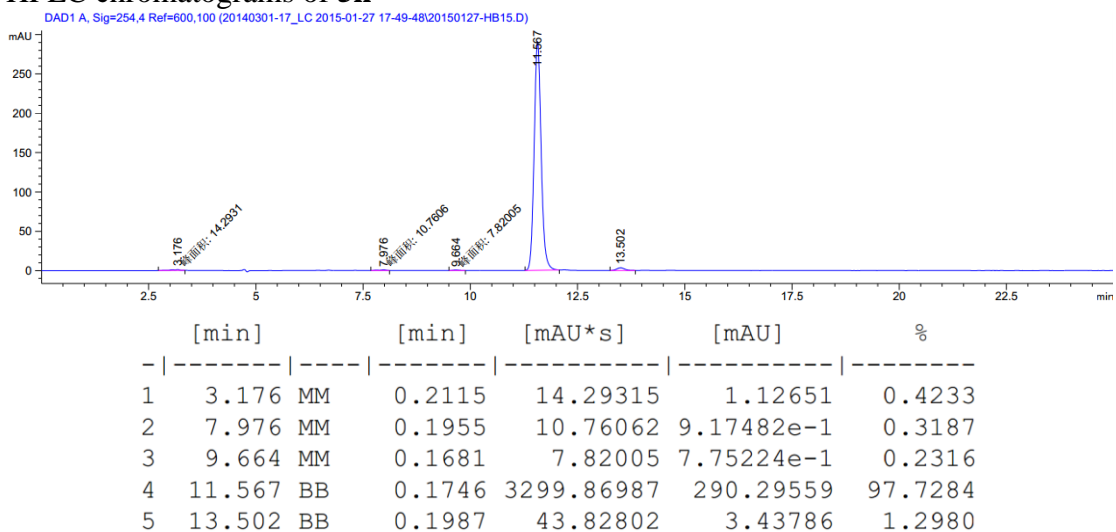

### HPLC chromatograms of 5i

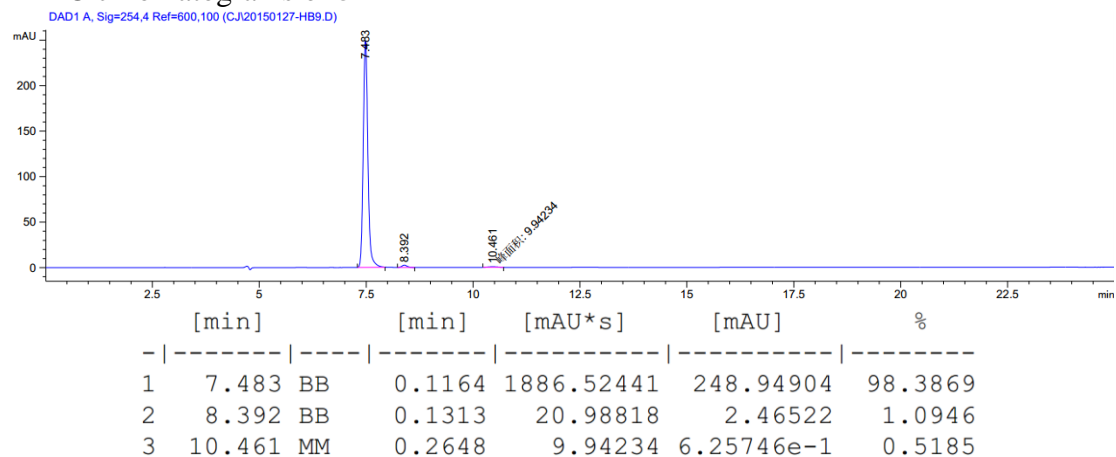

### HPLC chromatograms of 6a

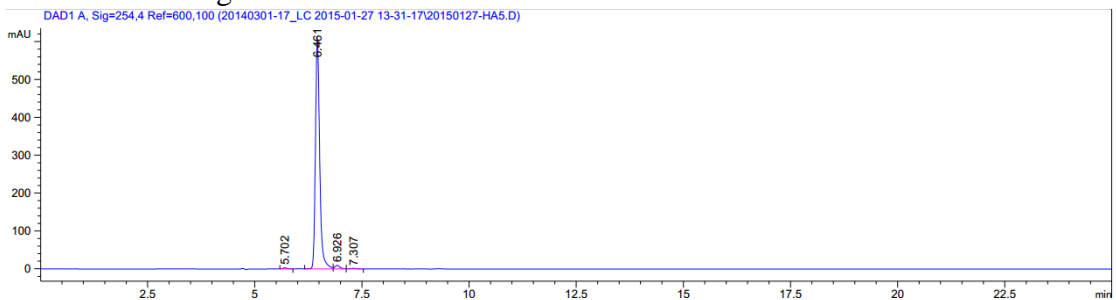

|   | [min] |    | [min]  | [mAU*s]    | [mAU]     | %       |
|---|-------|----|--------|------------|-----------|---------|
| 1 | 5.702 | BB | 0.1082 | 20.75567   | 2.87731   | 0.4784  |
| 2 | 6.461 | VV | 0.1052 | 4218.76172 | 606.12622 | 97.2378 |
| 3 | 6.926 | VB | 0.1234 | 79.72931   | 9.55048   | 1.8377  |
| 4 | 7.307 | BB | 0.1888 | 19.35796   | 1.45903   | 0.4462  |

### HPLC chromatograms of 6b

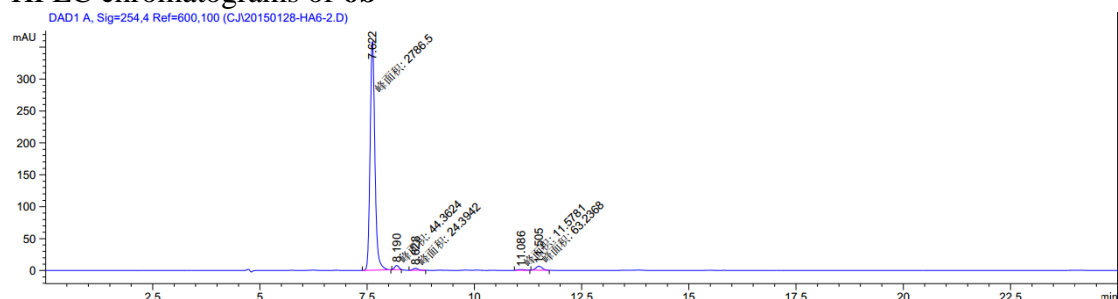

|   | [min]  |    | [min]  | [mAU*s]    | [mAU]     | %       |
|---|--------|----|--------|------------|-----------|---------|
| 1 | 7.622  | MM | 0.1297 | 2786.49927 | 358.09259 | 95.1001 |
| 2 | 8.190  | MM | 0.1141 | 44.36235   | 6.47758   | 1.5140  |
| 3 | 8.628  | MM | 0.1360 | 24.39417   | 2.99031   | 0.8325  |
| 4 | 11.086 | MM | 0.1629 | 11.57808   | 1.18474   | 0.3951  |
| 5 | 11.505 | MM | 0.1742 | 63.23684   | 6.05195   | 2.1582  |

### HPLC chromatograms of 6c

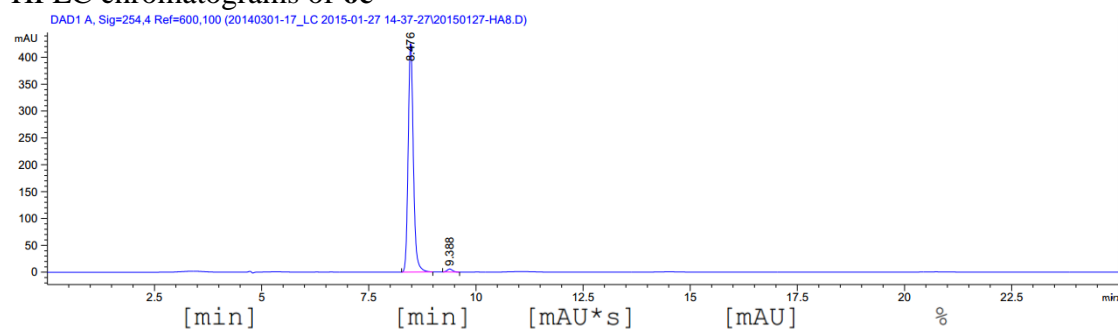

|   | [min] |    | [min]  | [mAU*s]    | [mAU]     | %       |
|---|-------|----|--------|------------|-----------|---------|
| 1 | 8.476 | BB | 0.1284 | 3591.13208 | 425.67303 | 98.6347 |
| 2 | 9.388 | BB | 0.1369 | 49.70747   | 5.63316   | 1.3653  |

### HPLC chromatograms of 6d

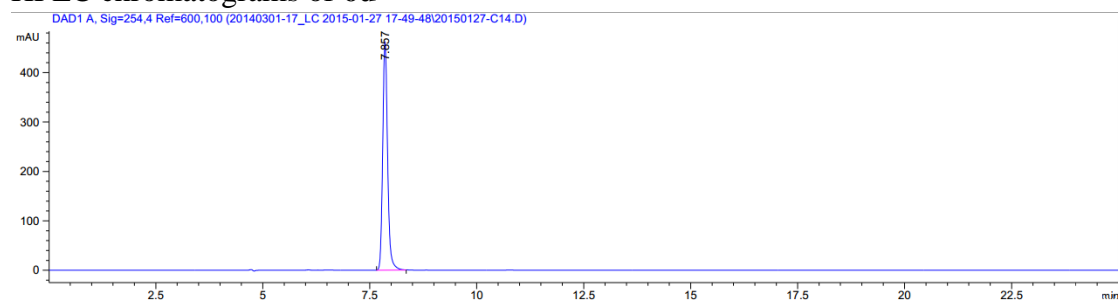

| # | [min] |    | [min]  | [mAU*s]    | [mAU]     | %        |
|---|-------|----|--------|------------|-----------|----------|
| 1 | 7.857 | BB | 0.1211 | 3676.74585 | 460.75665 | 100.0000 |

### HPLC chromatograms of 6e

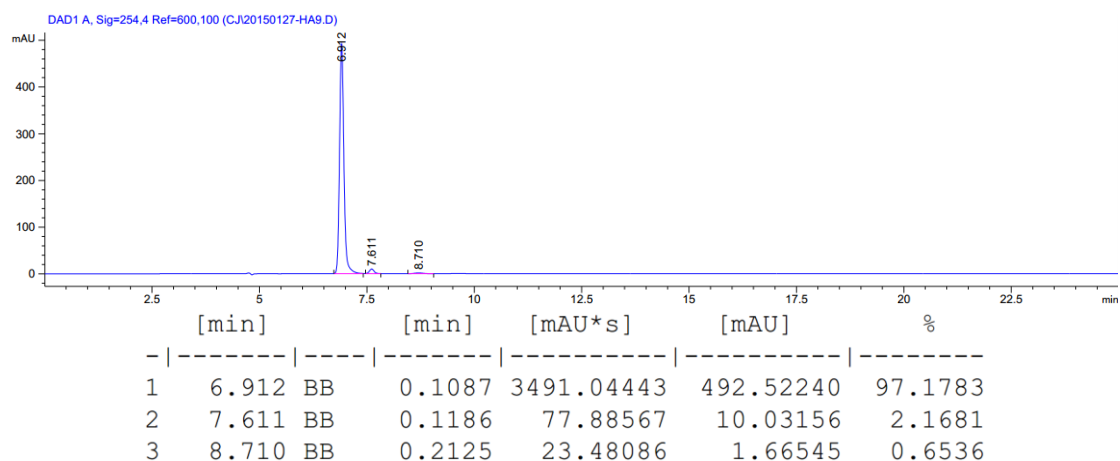

### HPLC chromatograms of 11a

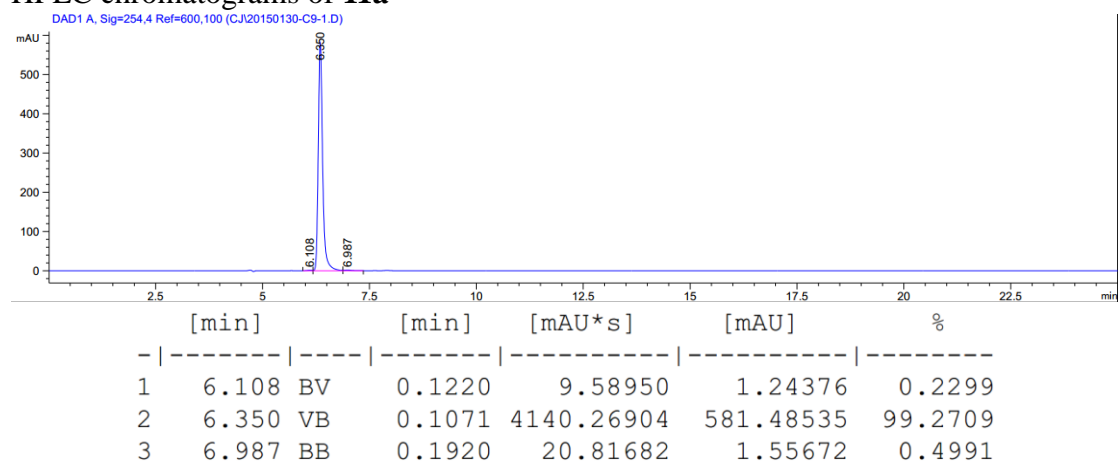

### HPLC chromatograms of 11b

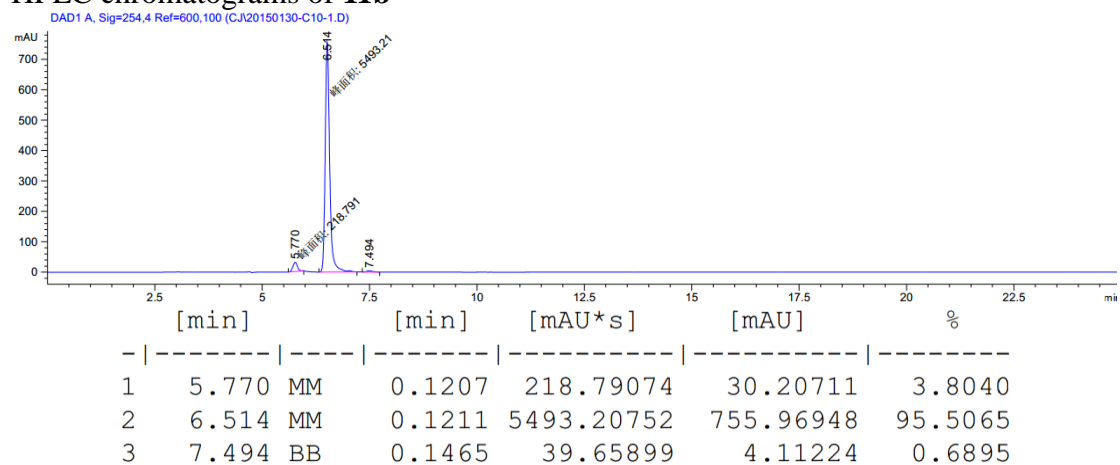

### HPLC chromatograms of 12a

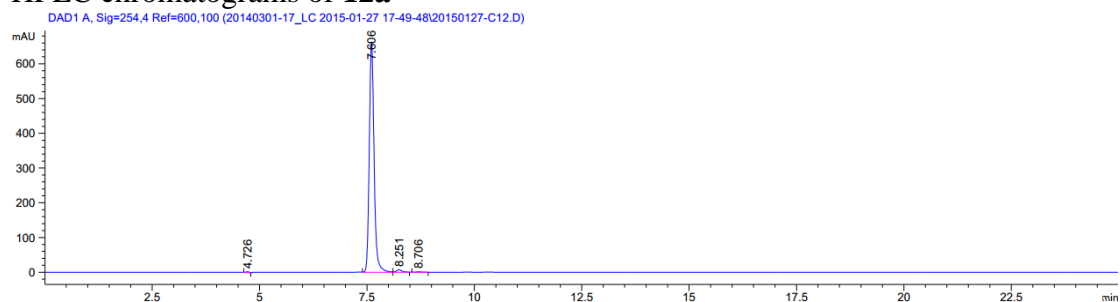

|   | [min] |    | [min]  | [mAU*s]    | [mAU]     | %       |
|---|-------|----|--------|------------|-----------|---------|
| 1 | 4.726 | BV | 0.0871 | 14.23811   | 2.54985   | 0.2715  |
| 2 | 7.606 | VV | 0.1185 | 5153.48779 | 664.05670 | 98.2827 |
| 3 | 8.251 | VB | 0.1364 | 64.90562   | 7.11895   | 1.2378  |
| 4 | 8.706 | BB | 0.1470 | 10.90375   | 1.10605   | 0.2079  |

### HPLC chromatograms of 12b

DAD1 A, Sig=254,4 Ref=600,100 (20140301-17\_LC 2015-01-27 17-49-48\20150127-C13.D)

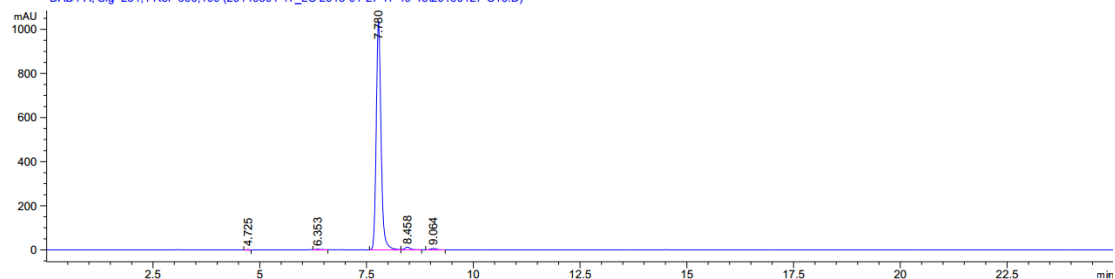

|   | [min] |    | [min]  | [mAU*s]    | [mAU]      | %       |
|---|-------|----|--------|------------|------------|---------|
| 1 | 4.725 | BV | 0.0880 | 14.53700   | 2.57028    | 0.1740  |
| 2 | 6.353 | VV | 0.1345 | 25.89314   | 2.73330    | 0.3100  |
| 3 | 7.780 | BV | 0.1220 | 8149.89795 | 1033.83801 | 97.5576 |
| 4 | 8.458 | VB | 0.1382 | 109.37187  | 11.79230   | 1.3092  |
| 5 | 9.064 | BB | 0.1350 | 54.23836   | 6.14055    | 0.6493  |

### HPLC chromatograms of 17a

DAD1 A, Sig=254,4 Ref=600,100 (20140301-17\_LC 2015-01-27 17-49-48\20150127-H178.D)

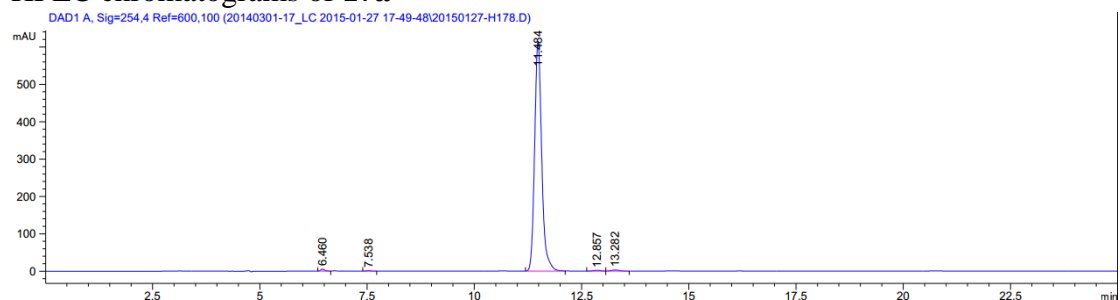

|   | [min]  |    | [min]  | [mAU*s]    | [mAU]     | %       |
|---|--------|----|--------|------------|-----------|---------|
| 1 | 6.460  | BB | 0.0968 | 34.22178   | 5.33618   | 0.4766  |
| 2 | 7.538  | BB | 0.1124 | 8.20953    | 1.13493   | 0.1143  |
| 3 | 11.484 | BB | 0.1767 | 7078.66699 | 613.24799 | 98.5740 |
| 4 | 12.857 | BV | 0.1861 | 23.53583   | 1.98843   | 0.3277  |
| 5 | 13.282 | VB | 0.1938 | 36.43209   | 2.91480   | 0.5073  |

### HPLC chromatograms of 17b

DAD1 A, Sig=254,4 Ref=600,100 (20140301-17\_LC 2015-01-27 17-49-48\20150127-H189.D)

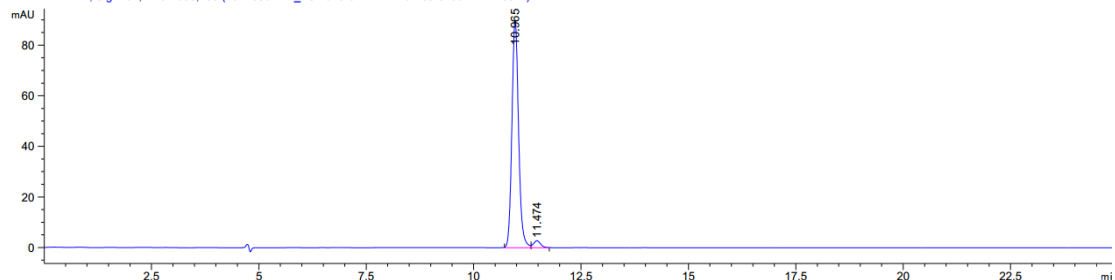

|   | [min]  |    | [min]  | [mAU*s]   | [mAU]    | %       |
|---|--------|----|--------|-----------|----------|---------|
| 1 | 10.965 | BB | 0.1655 | 968.28186 | 89.99854 | 96.8336 |
| 2 | 11.474 | BB | 0.1761 | 31.66253  | 2.75532  | 3.1664  |

## NMR spectra of typical compounds

5a

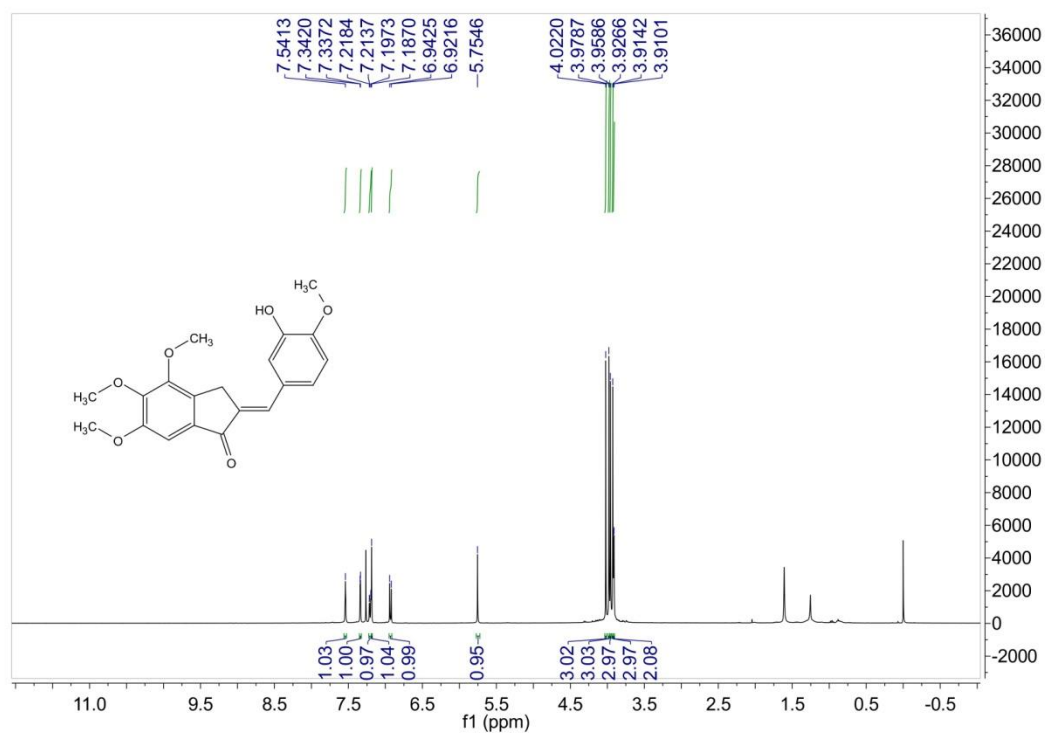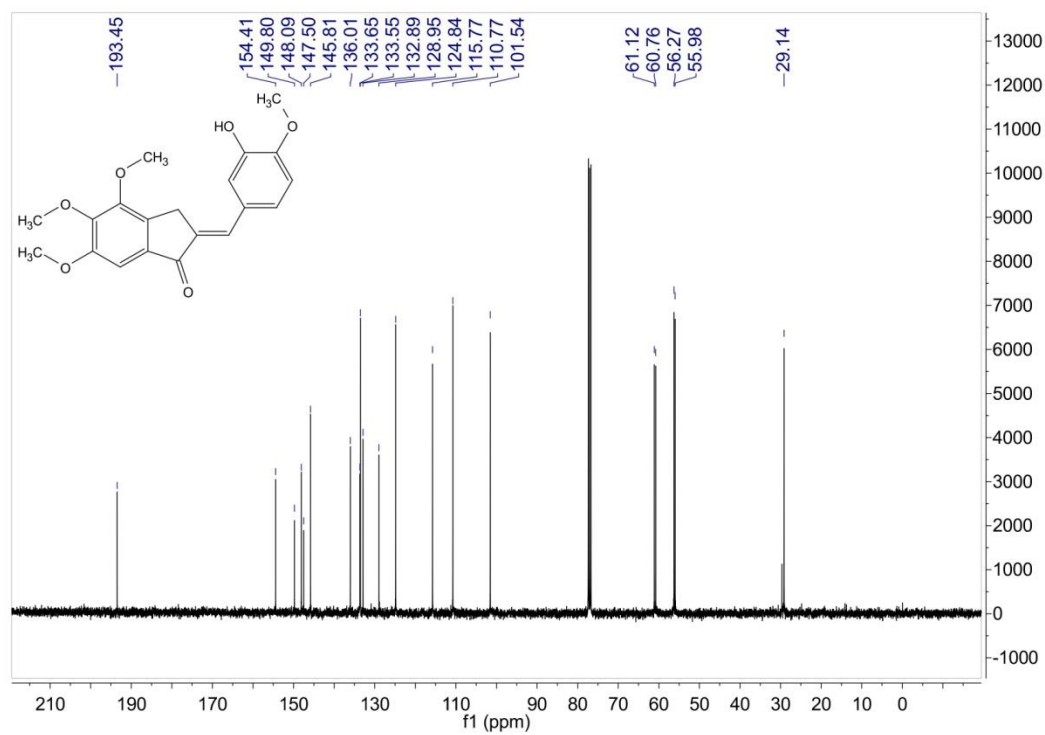



5c

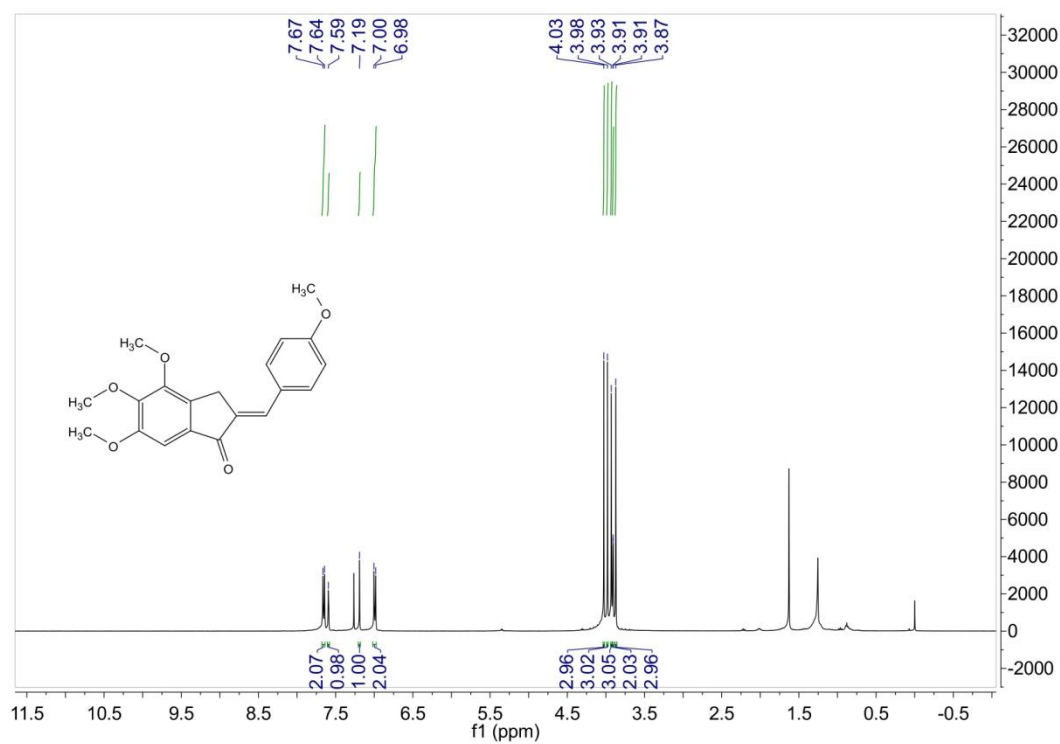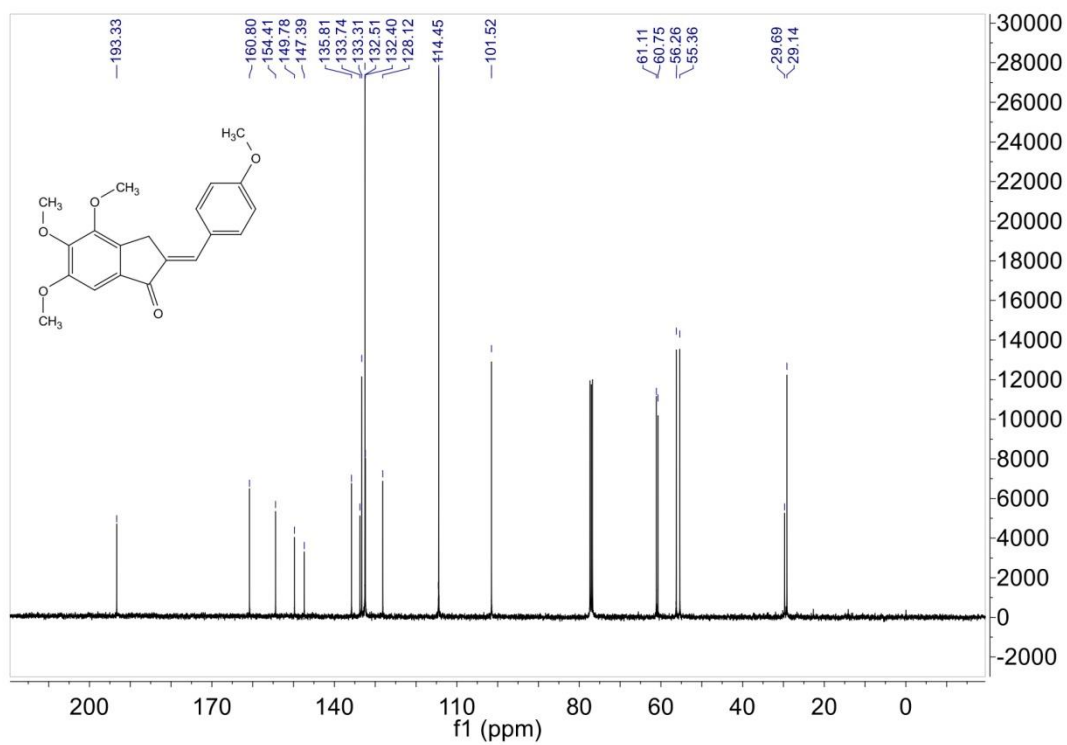

5g

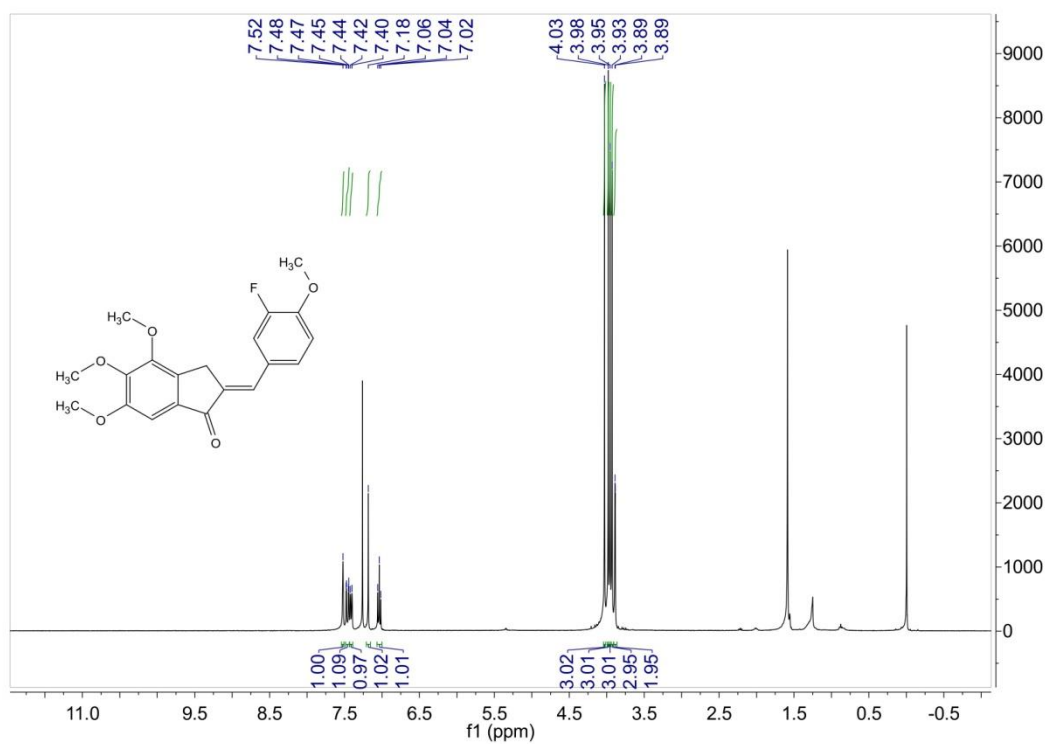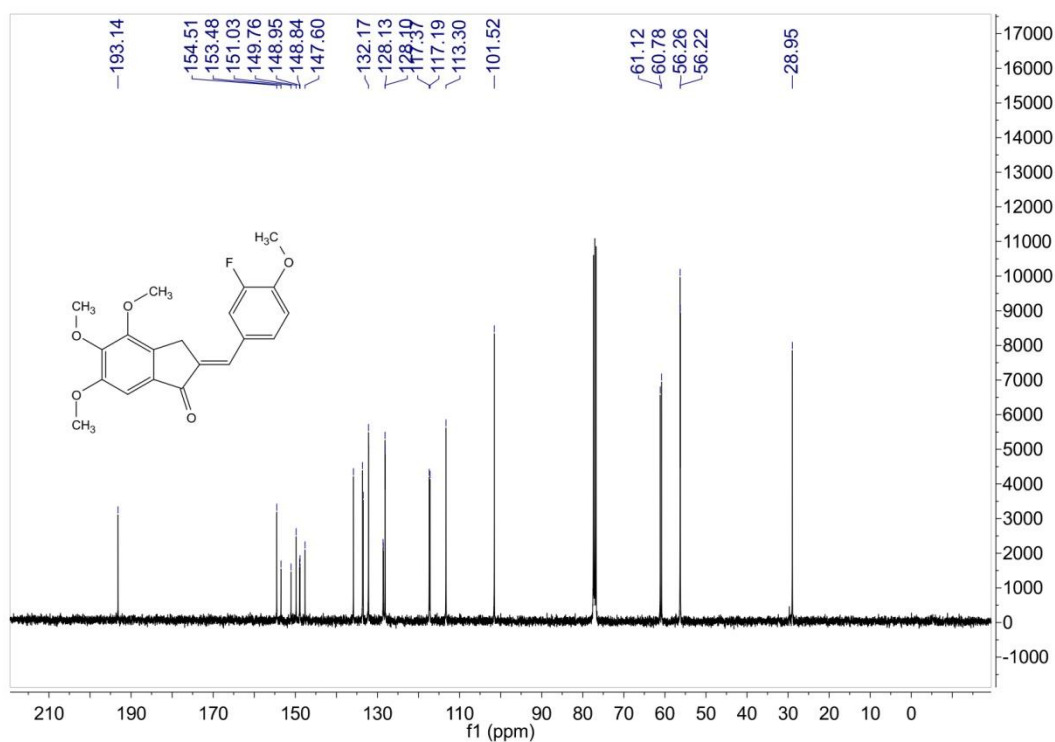

5h

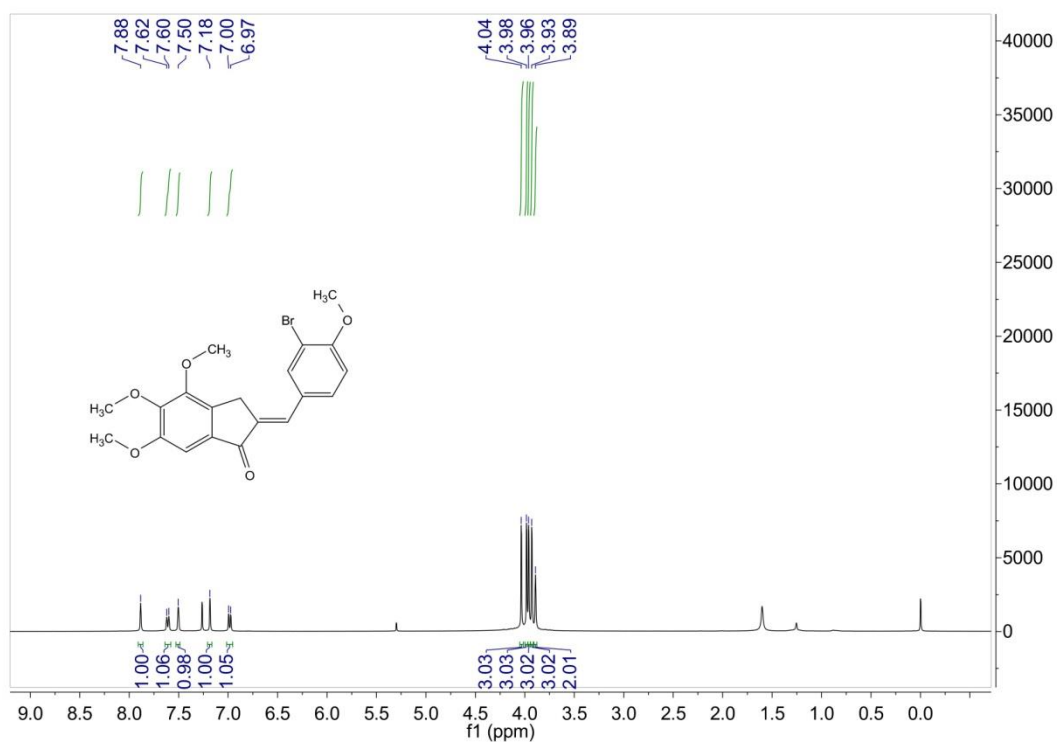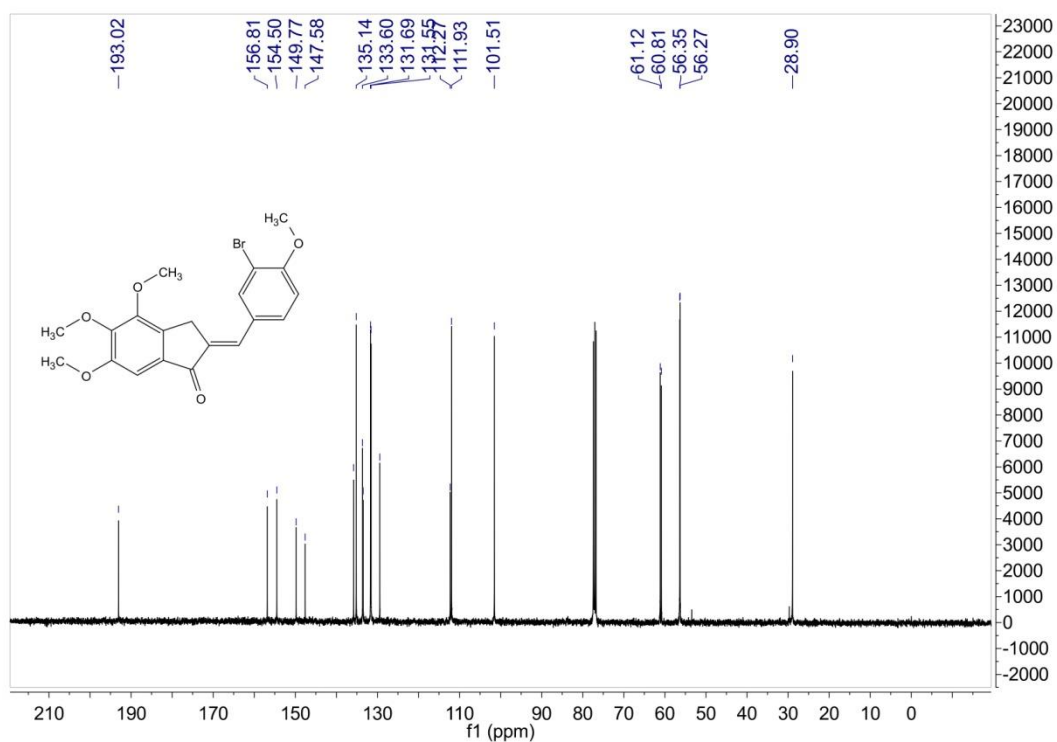

5i

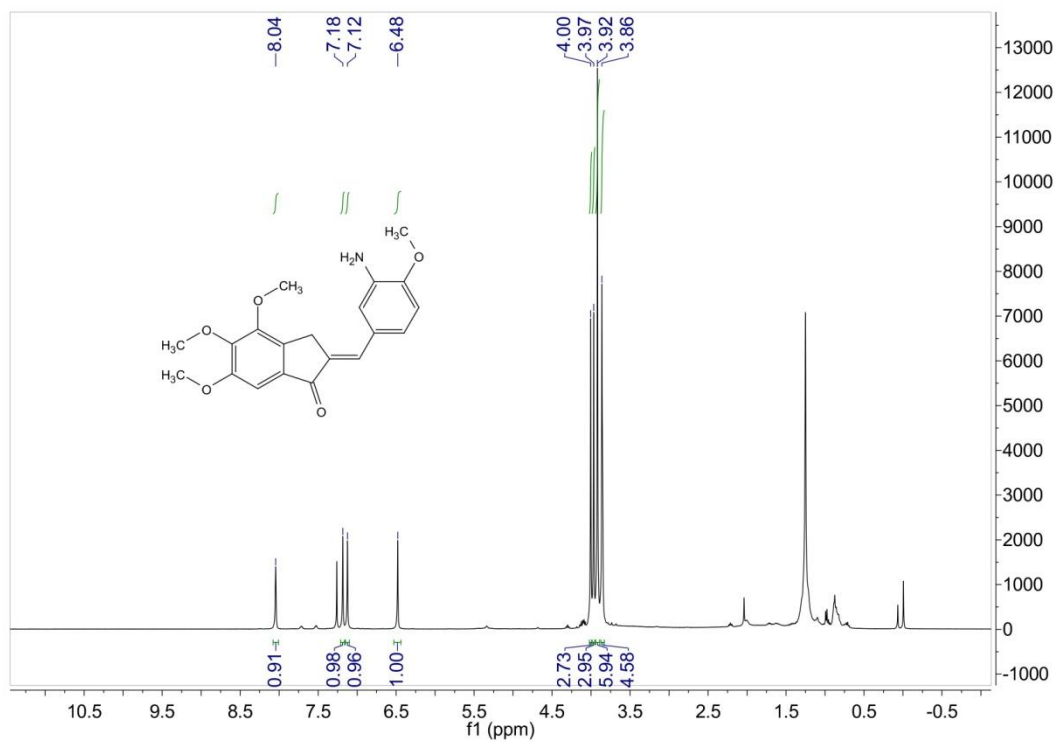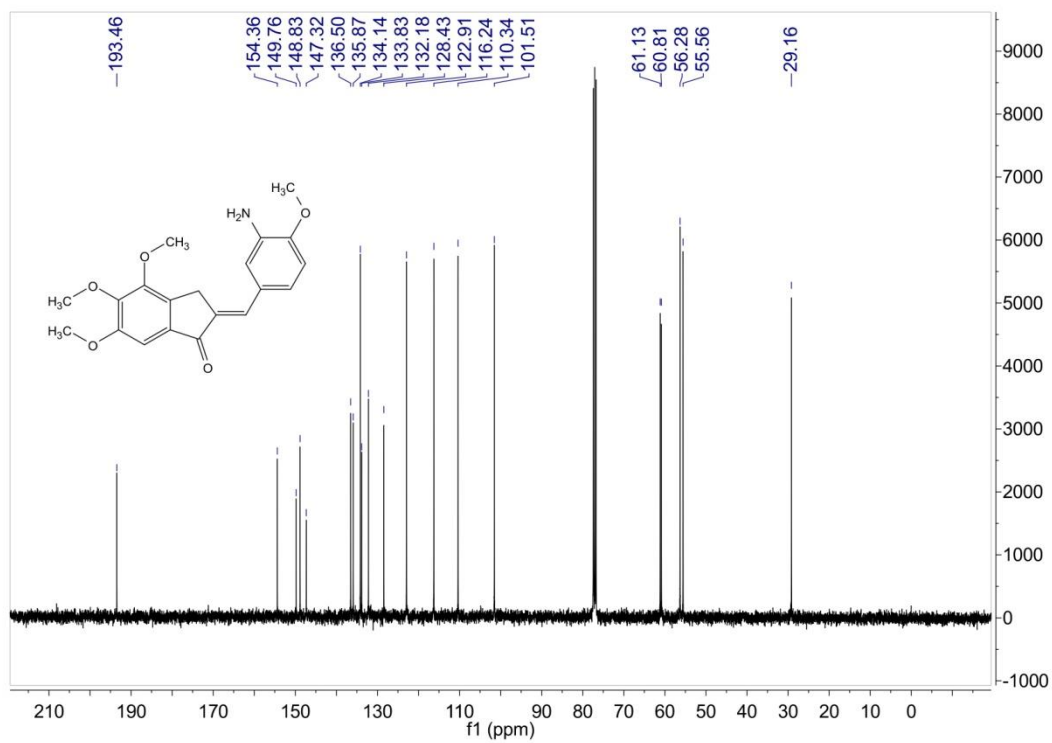

Supplement: c5md00139k1.pdf [file c5md00139k1.pdf]
